# Supplementary material for: Quantitative Investigation on the Contributing Factors to the Contact Angle of the CO2/H2O/Muscovite Systems Using the Frumkin-Derjaguin Equation
Source: Hindawi journal article supplement (doi:10.1155/2020/6656460), 2020-11-24
Supplement: f1 [file 6656460.f1.docx]

Quantitative Investigation on the Contributing Factors to the Contact Angle of the CO2/H2O/muscovite Systems using the Frumkin-Derjaguin Equation

Masashige Shiga1,2, Masaatsu Aichi2, and Masao Sorai3

1Institute for Geo-Resources and Environment, National Institute of Advanced Industrial Science and Technology, Tsukuba, Japan

2Department of Environment Systems, Graduate School of Frontier Sciences, the University of Tokyo, Kashiwa, Japan,

Contents of this file

Text S1

Figures S1 to S12

Tables S1 to S7

Introduction

This file contains

- (Figure S1,2) Detailed explanation of the method
- (Figure S3) Detail of calculation results related to
- (Figure S4,5 and Text S1) Detail of calculation results related to
- (Figure S6) Detail of calculation results related to
- (Figure S7-10 and Table S1-7) Detailed figures for related to
- (Figure S11,12) Contact angles with changing the surface electrical potentials at 0.1[MPa] and 3.0[MPa]

Text S1.

calculated by CP model for two surfaces with the opposite sign is negative in all thicknesses. calculated by CC model for those with the same sign is positive in all thicknesses. However, can act as both repulsive and attractive forces when the two potentials are different and have the same sign in CP model, or the absolute value of the two potentials are different and the opposite sign in CC model. changes sign as the thickness becomes smaller in such a case. This reversal of forces in thinner ranges is caused by the charge regulation. If the two potentials are equal to each other in CP model, remain positive as the thickness becomes smaller, and its magnitude becomes larger when they have higher absolute values such as (, )=(-60[mV], -60[mV]) or (60[mV], 60[mV]). Similarly, if the absolute values of the two potentials are equal to each other with the opposite sign in CC model, remains negative as the thickness becomes smaller.

Figure S1. A disjoining pressure curve and a capillary pressure; When is 50[kPa], the integration part is the red colored area minus the blue colored area. In this case, the blue area is larger than the red one, so the system is partially water-wet and has the finite contact angle ( >0)

Figure S2. A disjoining pressure curve which is positive at all regions and a capillary pressure; When is 50[kPa], the integration part is only a red-colored area, so the system is completely water-wet and the contact angle is zero.

Figure S3. Each of the Hamaker constant A11(muscovite), A22(CO2), A33(H2O), and A132(H2O sandwiched between CO2 and muscovite) at different pressure; A22 increases as the pressure increases unlike A11 and A33. This trend is related to the change in CO2 density by increasing pressure.

Figure S4. at various surface electrical potentials (, ) calculated from the CP (constant potential) model. In the case that both surface electrical potentials have the same signs and their absolute values are equal, for example (, )=(-60[mV], -60[mV]), the electrostatic interactions act as repulsive forces at all thickness. In some cases, it acts as repulsion at thicker cases and it acts as attractive forces at thinner cases, for example (, )=(-60[mV], -30[mV]). As the two surfaces are charged oppositely and have equal absolute value, attraction acts on the film at all thickness (for example, (, )=(-60[mV], 60[mV])).

Figure S5. at various surface electrical potentials (, ) calculated from the CC (constant charge) model. Unlike those obtained by CP model, it acts as repulsive forces at thinner cases except when two potentials have opposite signs and their absolute values are equal such as (, )=(-60[mV], 60[mV])

Figure S6. Integration at pH 2.5, 3.5, 4.5, and 8.5

Figure S7. ; “+”,“○”, “×”, and “□” indicate (CP), (CC), (CP), and (CC), respectively

Figure S8. ; “+” indicates and “” indicates

Figure S9. ; “+”,“○”, “×”, and “□” indicate (CP), (CC), (CP), and (CC), respectively

Figure S10. ; “+” indicates and “×” indicates

Figure S11. Contact angles with changing the surface electrical potentials at 0.1[MPa]; “□” shows the value calculated from the base case at Table.1. “×”, “○”, and “+” indicate values calculated from each different reported value (Alonso et al. (2006), Au et al. (2014), and Zhou et al. (2019)).

Figure S12. Contact angles with changing the surface electrical potentials at 3.0[MPa]; “□” shows the value calculated from the base case at Table.1. “×”, “○”, and “+” indicate values calculated from each different reported value (Alonso et al. (2006), Au et al. (2014), and Zhou et al. (2019)). Parameters for this map are from physical properties at 3.0[MPa].

Table S1. Hamaker constant of muscovite

| mineral | A11 [J] | Reference |
| --- | --- | --- |
| muscovite |  | Israelachvili and Tabor (1972) |
|  | Hough and White (1980) |
|  | Bergström (1997) |
|  | Ackler et al. (1996) |

Table S2. Positive/negative sign of calculated by CP or CC model with the positive/negative sign of electric potential or charge at two surfaces

| Model | Same sign | Opposite sign |
| --- | --- | --- |
| CP | Negative at thinner film if  Remain positive if | Negative in all thickness |
| CC | Positive in all thickness | Positive at thinner film if  Remain negative if |

Table S3. Thickness of two films at each pressure condition

| Pressure [MPa] | [nm] | | [nm] | |
| --- | --- | --- | --- | --- |
| CP | CC | CP | CC |
| 0.1 | 0.338 | 0.339 | 0.728 | 0.730 |
| 3.0 | 0.331 | 0.331 | 0.747 | 0.749 |
| 10.0 | 0.326 | 0.326 | 0.739 | 0.741 |

Table S4. at each pressure condition

| Pressure [MPa] | [mN/m] | | [mN/m] | |
| --- | --- | --- | --- | --- |
| CP | CC | CP | CC |
| 0.1 | 5.64211267 | 5.60887496 | 1.21622072 | 1.20956562 |
| 3.0 | 5.64116516 | 5.64116516 | 1.10760166 | 1.10169446 |
| 10.0 | 3.31959668 | 3.31959668 | 0.6459987 | 0.64251624 |

Table S5. at each pressure condition

| Pressure [MPa] | [mN/m] | | [mN/m] | |
| --- | --- | --- | --- | --- |
| CP | CC | CP | CC |
| 0.1 | 0.03028305 | 0.76613522 | 0.03443573 | 0.33264933 |
| 3.0 | -0.2762607 | 0.13431812 | -0.1098888 | 0.04731767 |
| 10.0 | -0.3162991 | 0.10750423 | -0.1266503 | 0.03511912 |

Table S6. at each pressure condition

| Pressure [MPa] | [mN/m] | | [mN/m] | |
| --- | --- | --- | --- | --- |
| CP | CC | CP | CC |
| 0.1 | -10.982371 | -10.951359 | -1.1297823 | -1.1230386 |
| 3.0 | -15.0872 | -15.0872 | -2.4757012 | -2.4700688 |
| 10.0 | -15.212867 | -15.212867 | -2.4918635 | -2.4888146 |

Table S7. at each pressure condition

| Pressure [MPa] | [mN/m] | | [mN/m] | |
| --- | --- | --- | --- | --- |
| CP | CC | CP | CC |
| 0.1 | -5.3099757 | -4.5763488 | 0.12087413 | 0.4191764 |
| 3.0 | -9.7222956 | -9.3117168 | -1.4779884 | -1.3210567 |
| 10.0 | -12.209569 | -11.785766 | -1.9725152 | -1.8111792 |
